# Supplementary material
Source: ML conference proceedings conference paper supplement (https://www.ecva.net/papers/eccv_2020/papers_ECCV/html/123540239_ECCV_2020_paper.php)

# Deep Hough Transform for Semantic Line Detection

— Supplemental Material —

In the supplementary material we provide detailed network architectures and additional experimental results.

## 1 Network Architecture

Here we detail the proposed network architectures. The proposed Deep Hough Transform (DHT) module and Reverse Hough Transform (RHT) are embedded into a FPN backbone. Taking ResNet50 based FPN as an example, details are given in Fig. 1.

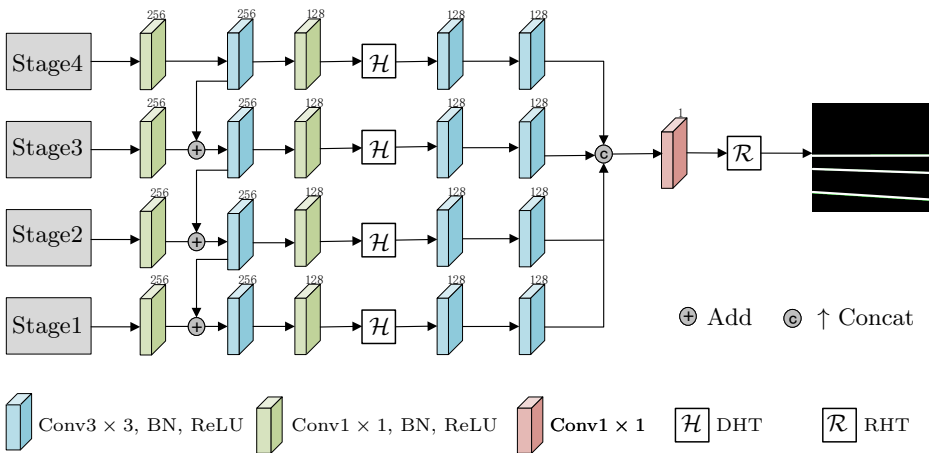

Fig. 1. Details of our network architecture.

## 2 All Results on SEL Dataset

We provide ALL the detection results on the SEL dataset[29]. Bottom rows are result of SLNet[29] and upper rows are results produced by our method.

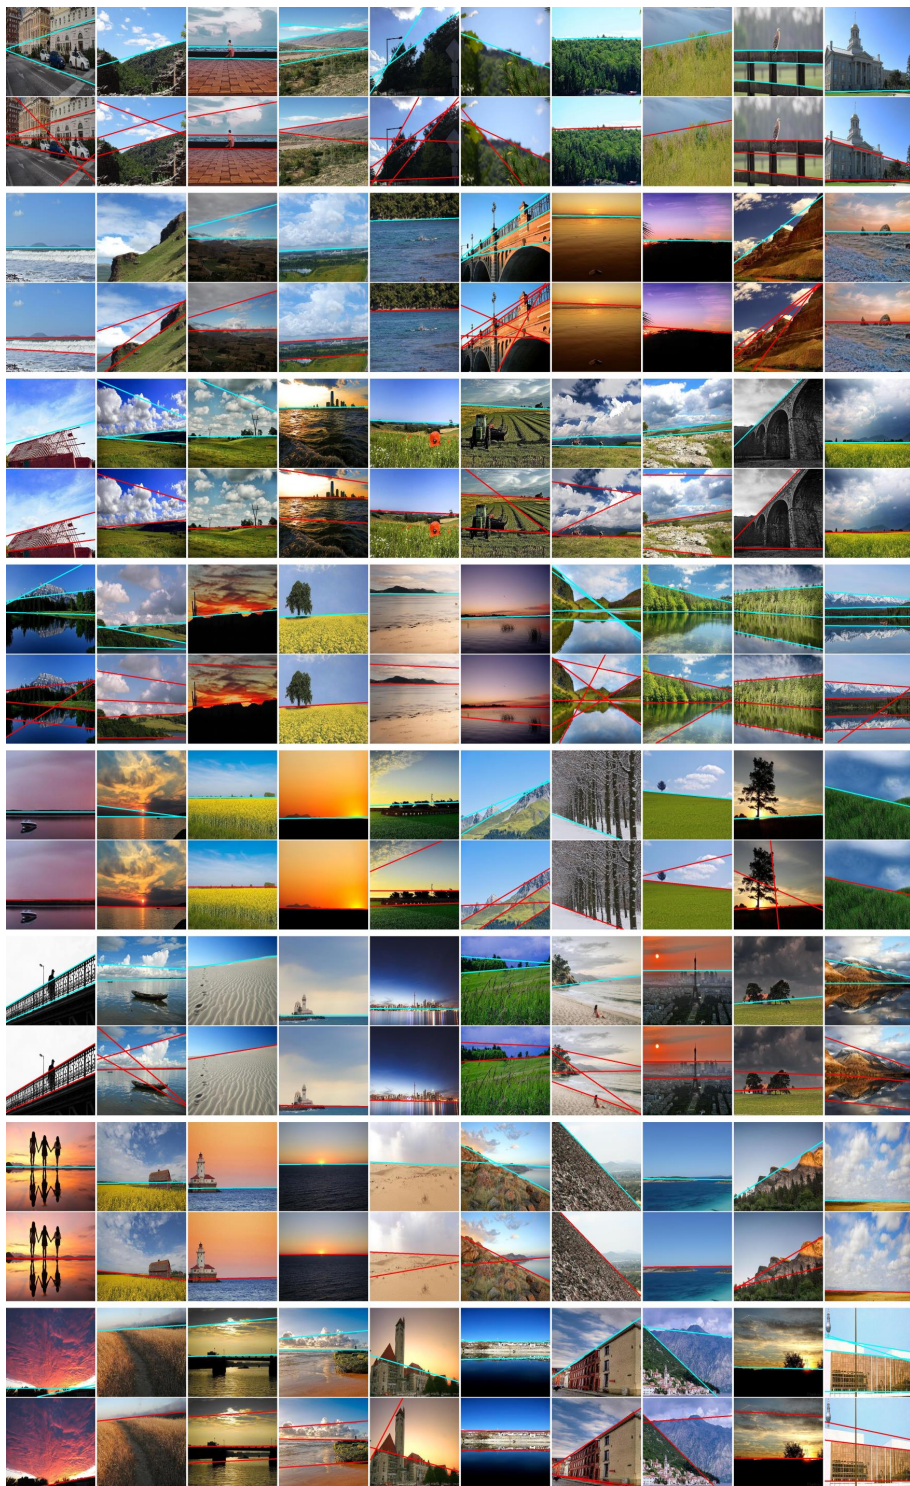



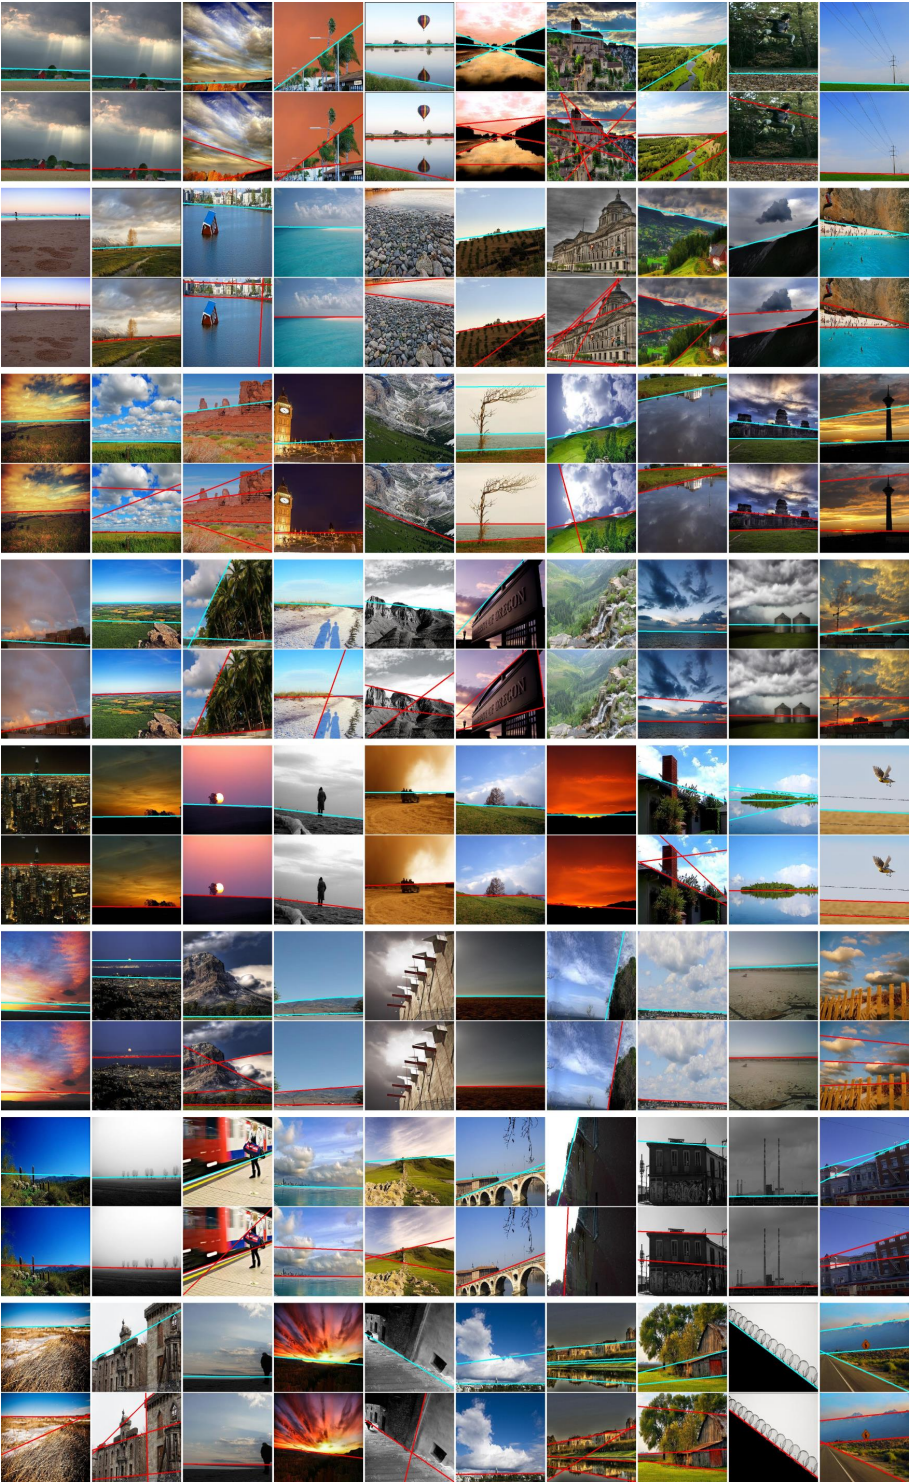

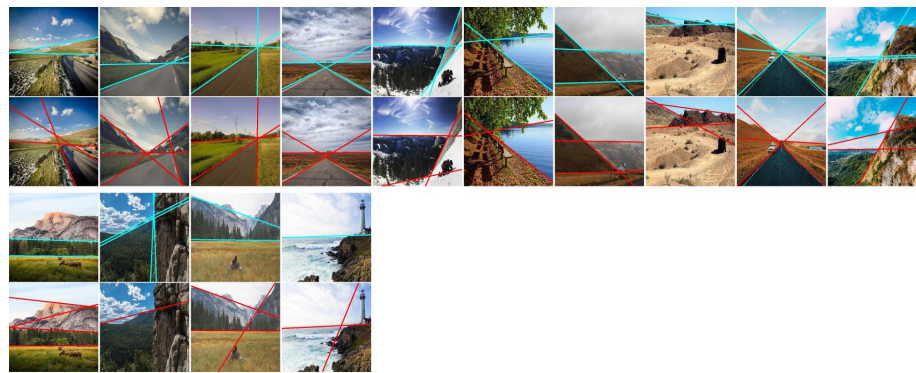

Supplement: Supplementary file 1 [file 123540239-supp.pdf]
